# Supplementary material for: Biomimetic assembly of multilevel hydroxyapatite using bacterial cellulose hydrogel as a reactor
Source: Royal Society of Chemistry journal article supplement (doi:10.1039/c9ce01086f), 2019-01-01
Supplement: c9ce01086f1.pdf [file c9ce01086f1.pdf]

## Electronic Supplementary Information

# Biomimetic assembly of multilevel hydroxyapatite using bacterial cellulose hydrogel as a reactor

Xun Liu,<sup>\*a,b</sup> Kangxin Li,<sup>a</sup> Chaoqun Wu,<sup>a</sup> Zhaoqian Li,<sup>a</sup> Bo Wu,<sup>a</sup> Xiaohui Duan,<sup>a</sup> Yong Zhou<sup>c</sup>  
and Chonghua Pei<sup>\*a</sup>

<sup>a</sup> State Key Laboratory of Environment-friendly Energy Materials, Southwest University of Science and Technology, Mianyang 621010, China.

<sup>b</sup> Department of Chemical Engineering, University of Michigan, Ann Arbor, Michigan 48109, USA.

<sup>c</sup> Department of Materials Science and Engineering, National Lab of Solid State Microstructure, ERERC, Nanjing University, Nanjing 210093, China.

## Materials and methods

### Chemicals

The raw chemicals used in this experiment, including Na<sub>3</sub>PO<sub>4</sub>, CaCl<sub>2</sub> and CuSO<sub>4</sub>, were all analytically pure. The bacterial cellulose hydrogel (BCH) was food-grade. The Wal-Mart supermarket provided hen eggs. The experimental water was ultrapure (UPT-I-5/10/20T).

### Preparation

Purification of BCH: cut BCH into uniform pieces of about 1 cm<sup>3</sup>, then put them into beaker, continue to add 5% NaOH solution, boil the mixture for 30 minutes, and finally wash BCH with ultrapure water to neutral pH.

Sample preparation: the initial concentration of CaCl<sub>2</sub> solution and Na<sub>3</sub>PO<sub>4</sub> solution was 0.2 mol/L. Egg white was added to the two solutions at 1 v/v%. BCH was first soaked in CaCl<sub>2</sub> solution for 24 h, then transferred to Na<sub>3</sub>PO<sub>4</sub> solution to continue to soak for another 24h to mineralize it fully. After mineralization, the result was extracted, washed and dried for subsequent tests.

### Characterization

A BX51 polarizing microscope (Olympus Co., Japan) was used to observe the samples' appearance, and a TM-1000 electron microscope produced by Japan Hitachi Company was used to observe their morphology. An X-ray diffractometer (D/max-RB, Rigaku Co., Japan) was used to investigate crystal type, with a Cu K $\alpha$  radiation source and a step scan of 0.020 from 2.50 to 600 ( $\lambda=0.15418$  nm, voltage=30 kV, current=20 mA). The Fourier transform infrared spectroscopy (FTIR) test was done using a FT-IR-G988 (Thermo Nicolet Co., America) to determine composition; the scanning range was from 4000 cm<sup>-1</sup> to 400 cm<sup>-1</sup> with an accuracy of 4 cm<sup>-1</sup>. TEM characterization was done using the Libra 200FE 200 kV field emission transmission electron microscopy system produced by Carl Zeiss Smt Pte Ltd (Germany).

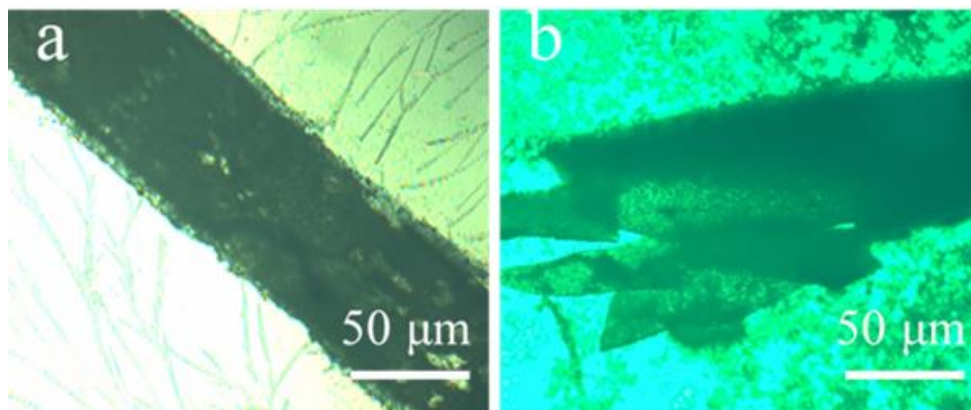

**Fig. S1** Optical microscope pictures of the filamentous mineralization.

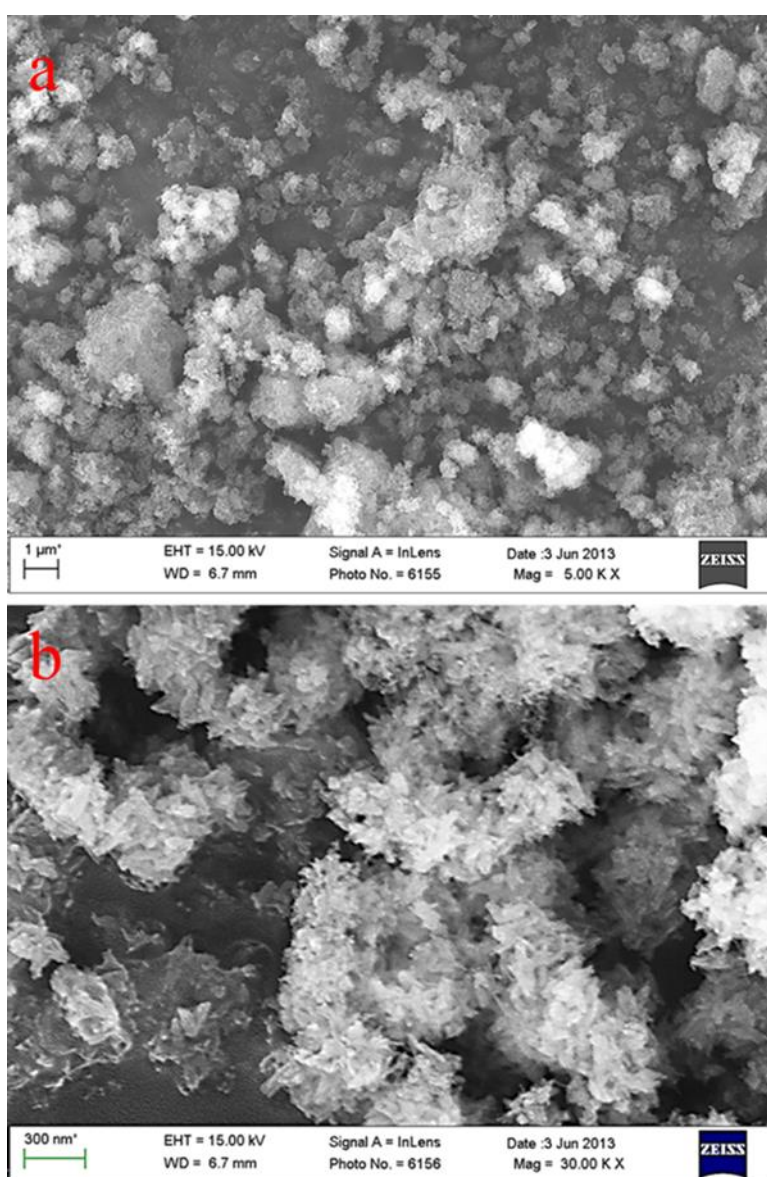

**Fig. S2** SEM images of filamentous mineralization prepared without EW.

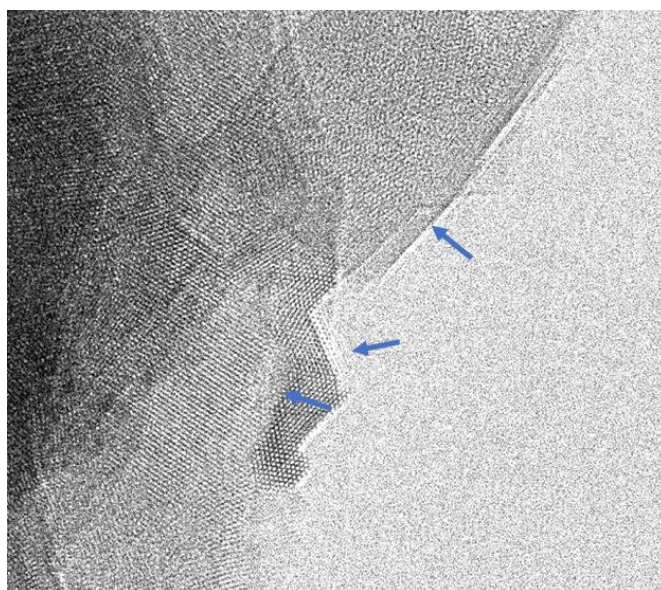

**Fig. S3** HRTEM image of filamentous mineralization prepared with EW.

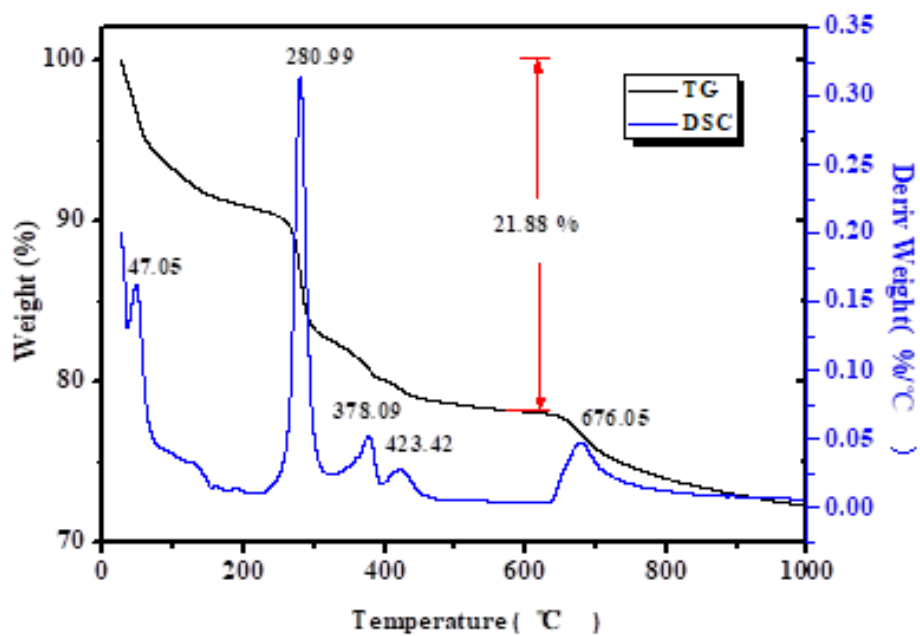

**Fig. S4** TG-DSC curves of filamentous mineralization prepared without EW.

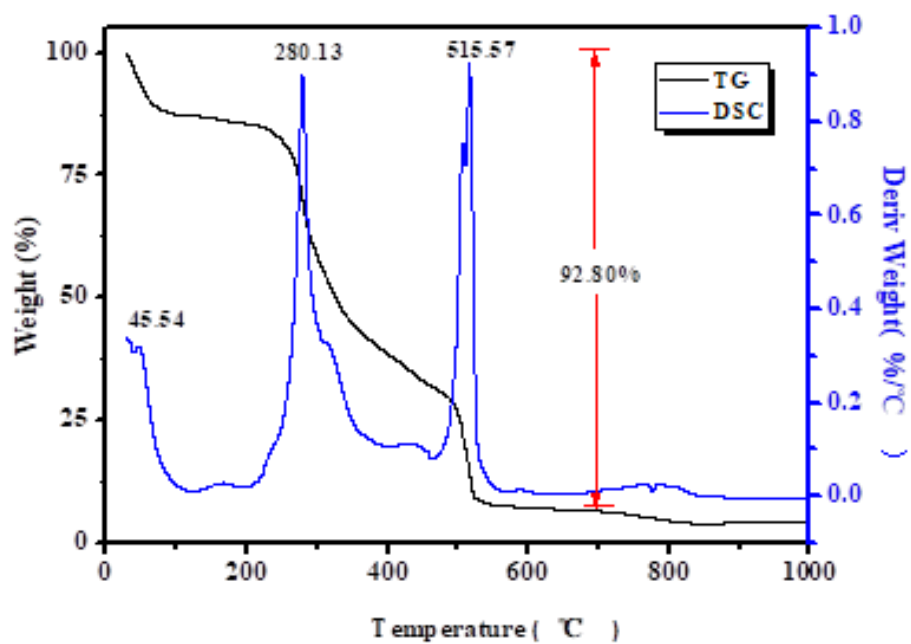

**Fig. S5** TG-DSC curves of pure dried EW.

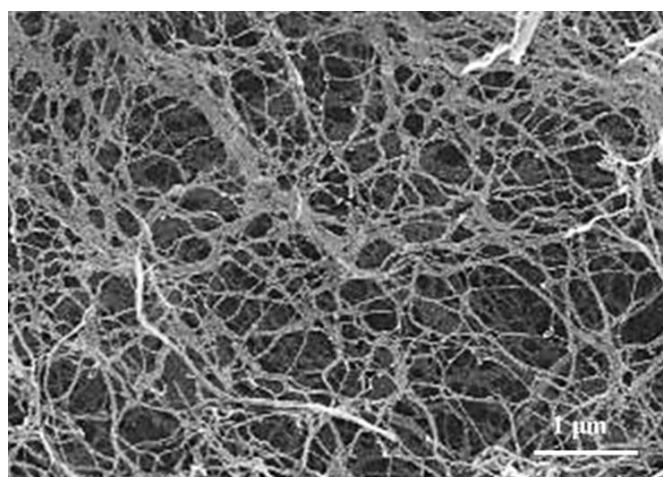

**Fig. S6** SEM image of bacterial cellulose

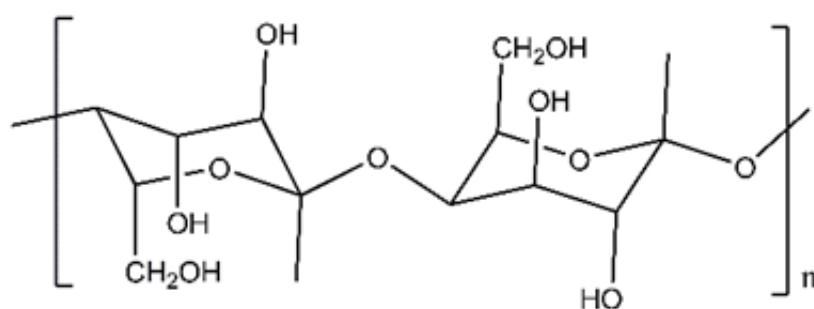

**Fig. S7** Chemical structure of bacterial cellulose

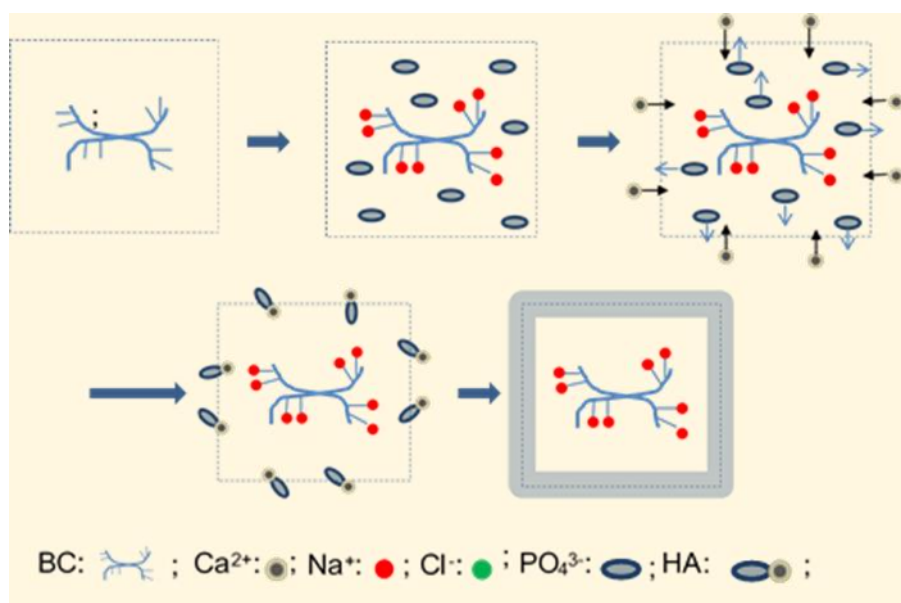

**Fig. S8** Diagram of the mineralization mechanism for the sample prepared in the CaCl<sub>2</sub> solution.

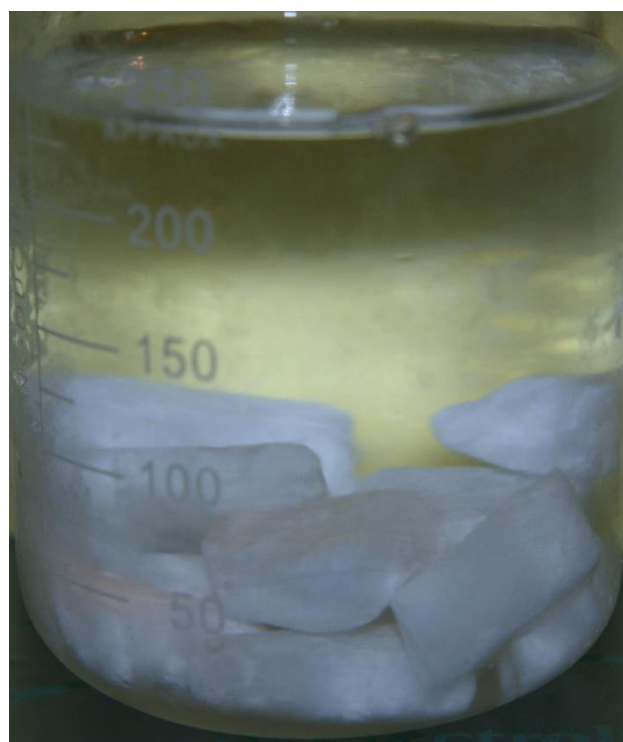

**Fig. S9** Photo of samples mineralized in the CaCl<sub>2</sub> solution.

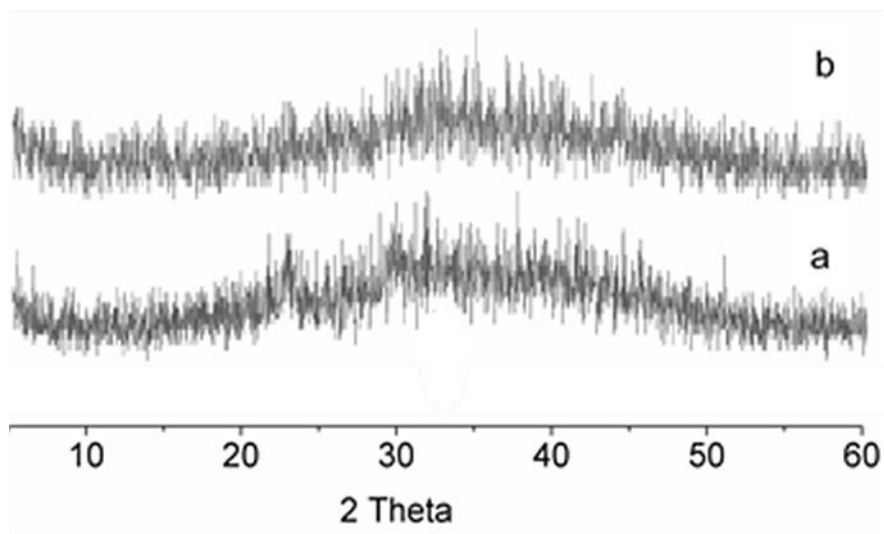

**Fig. S10** XRD patterns of mineralized samples prepared in the  $\text{CaCl}_2$  solution (a) with egg white and (b) without.

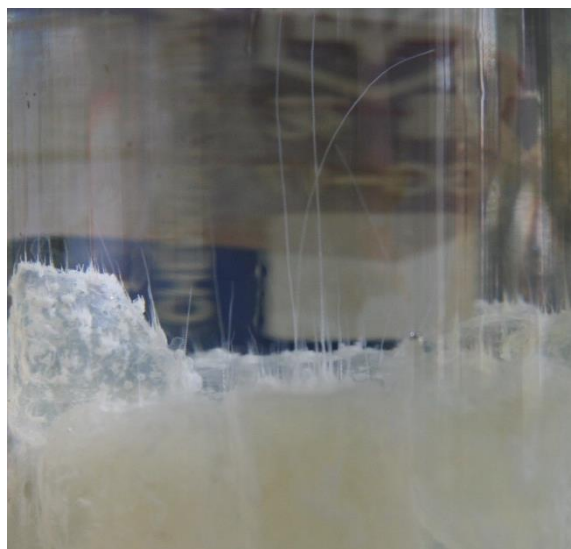

**Fig. S11** Photo of the sample prepared using agar gel as template (mineralized in the  $\text{Na}_3\text{PO}_4$  solution).

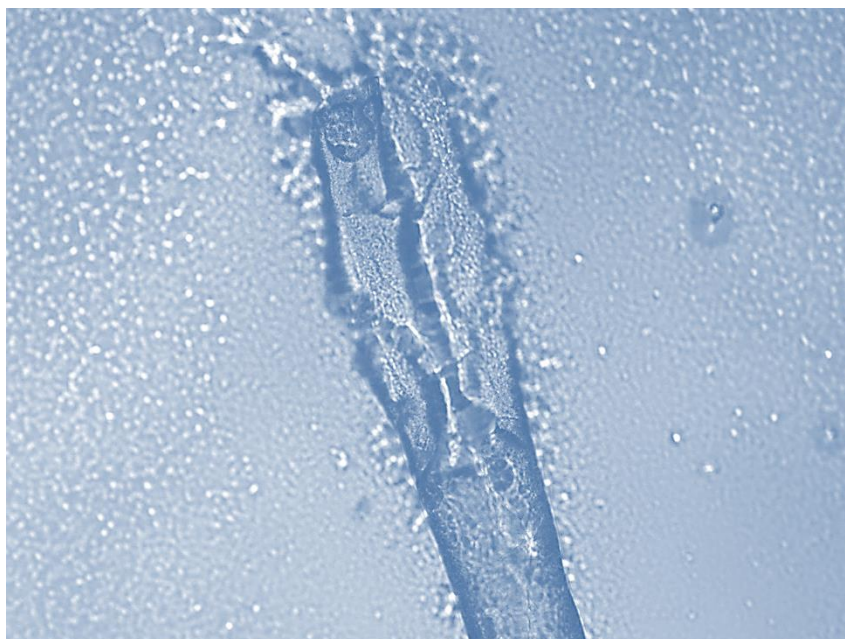

**Fig. S12** Optical microscope photo of the filamentous mineralization prepared using agar gel as template (mineralized in the  $\text{Na}_3\text{PO}_4$  solution).

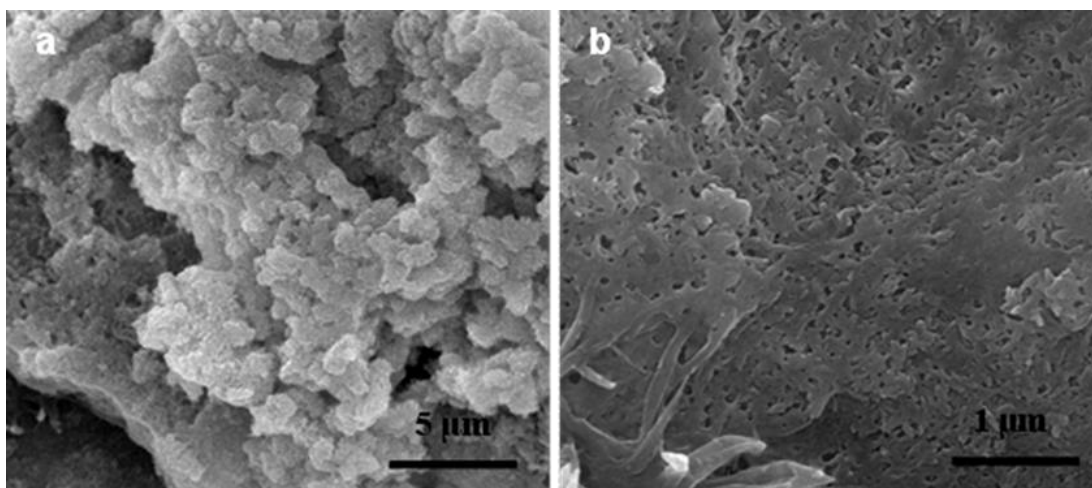

**Fig. S13** SEM images at different magnifications of the mineralization prepared using phosphorylated BCH as template.

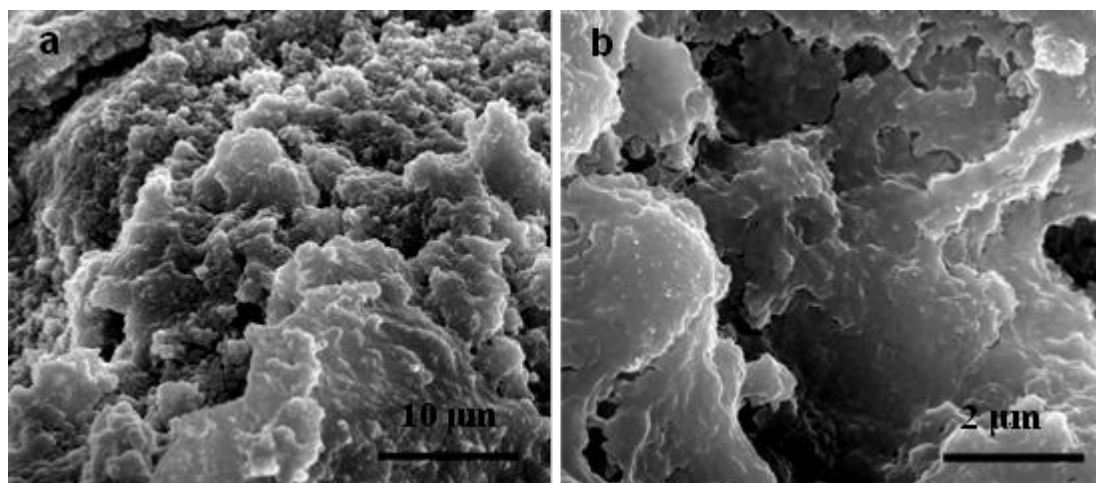

**Fig. S14** SEM images at different magnifications of the mineralization prepared using oxidized BCH as template.

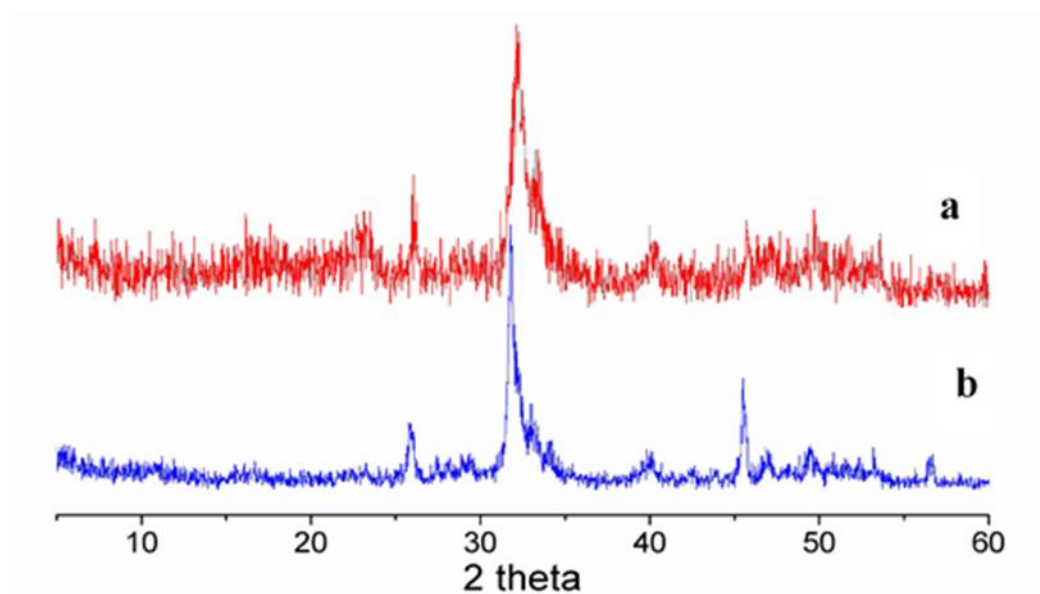

**Fig. S15** XRD patterns of the samples prepared using (a) phosphorylated BCH and (b) oxidized BCH as template.
